# Supplementary material
Source: PubMed Central journal article supplement (PMC1459362)

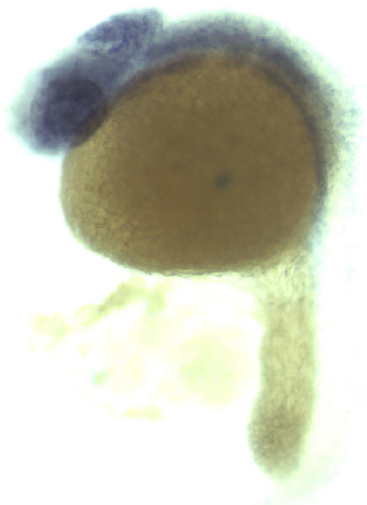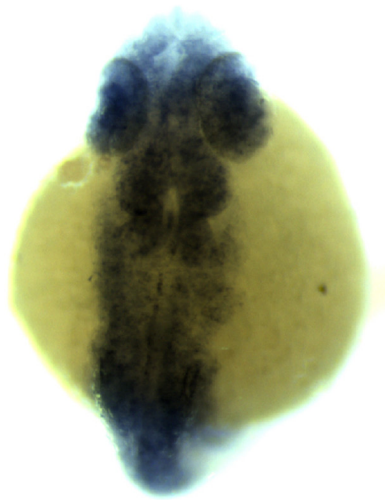

---

**1 dpf**

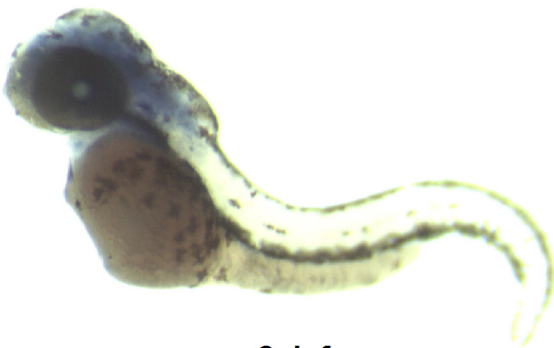

**2 dpf**

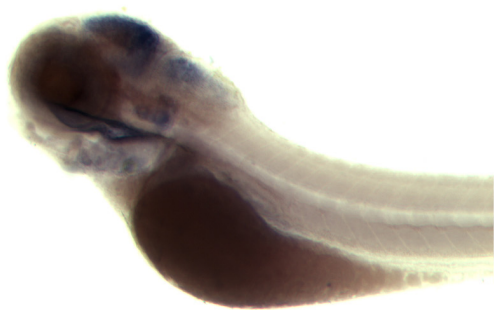

**3 dpf**

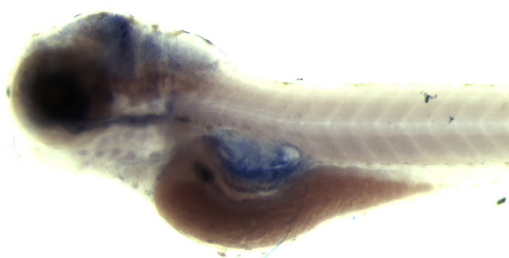

**4 dpf**

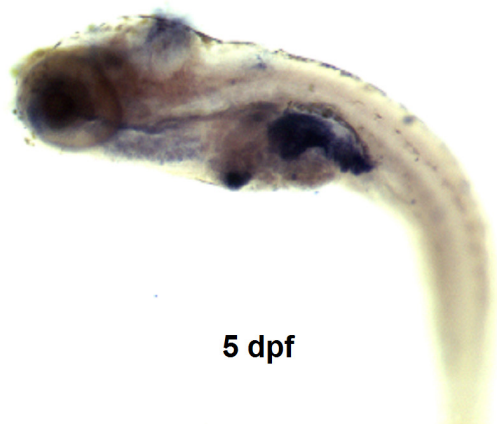

**5 dpf**

Supplement: pnas_0508585103_2.pdf [file pnas_0508585103_2.pdf]

**A**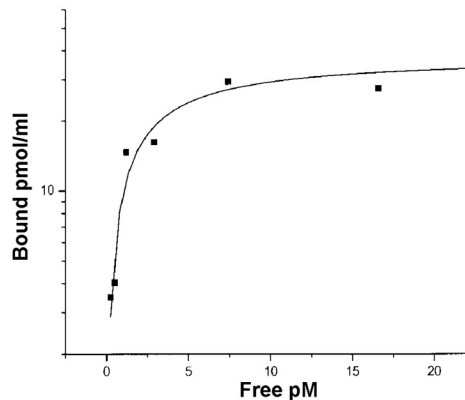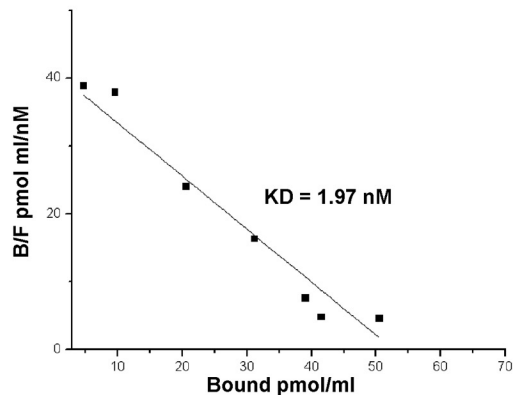**B**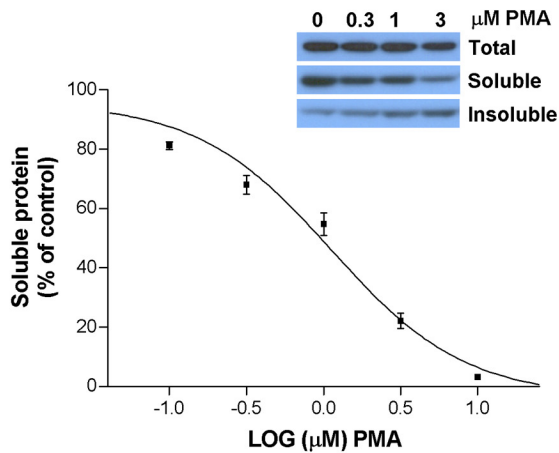**C**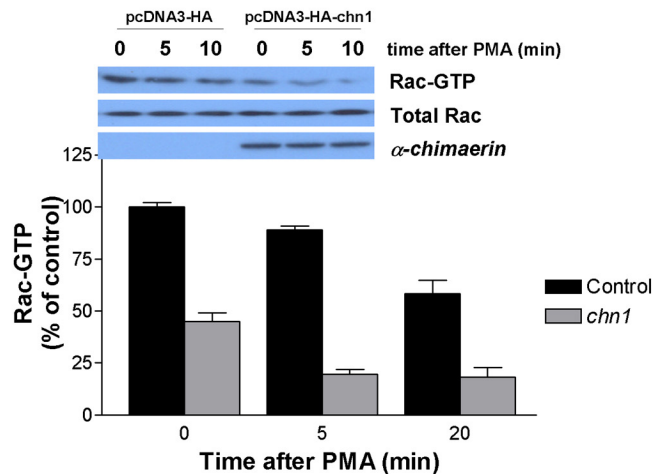

Supplement: pnas_0508585103_3.pdf [file pnas_0508585103_3.pdf]

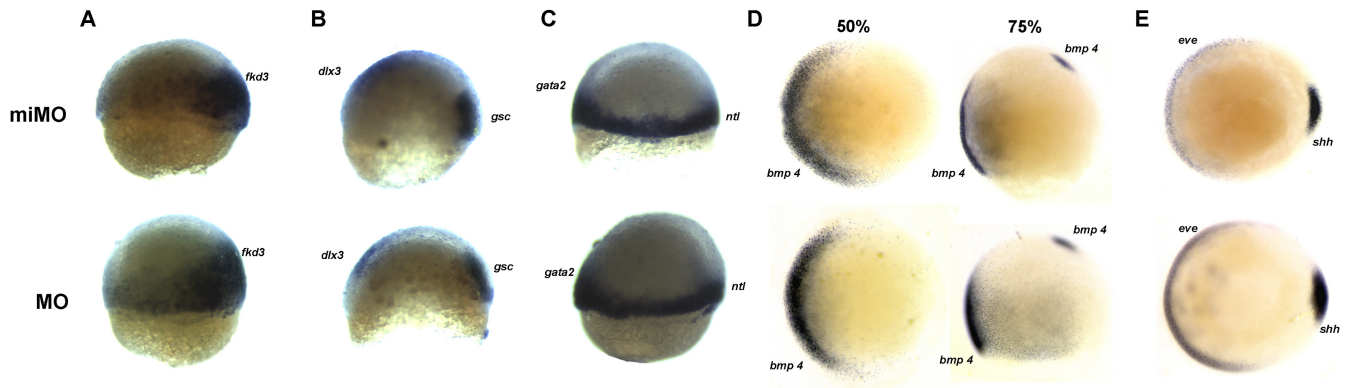

Supplement: pnas_0508585103_4.pdf [file pnas_0508585103_4.pdf]

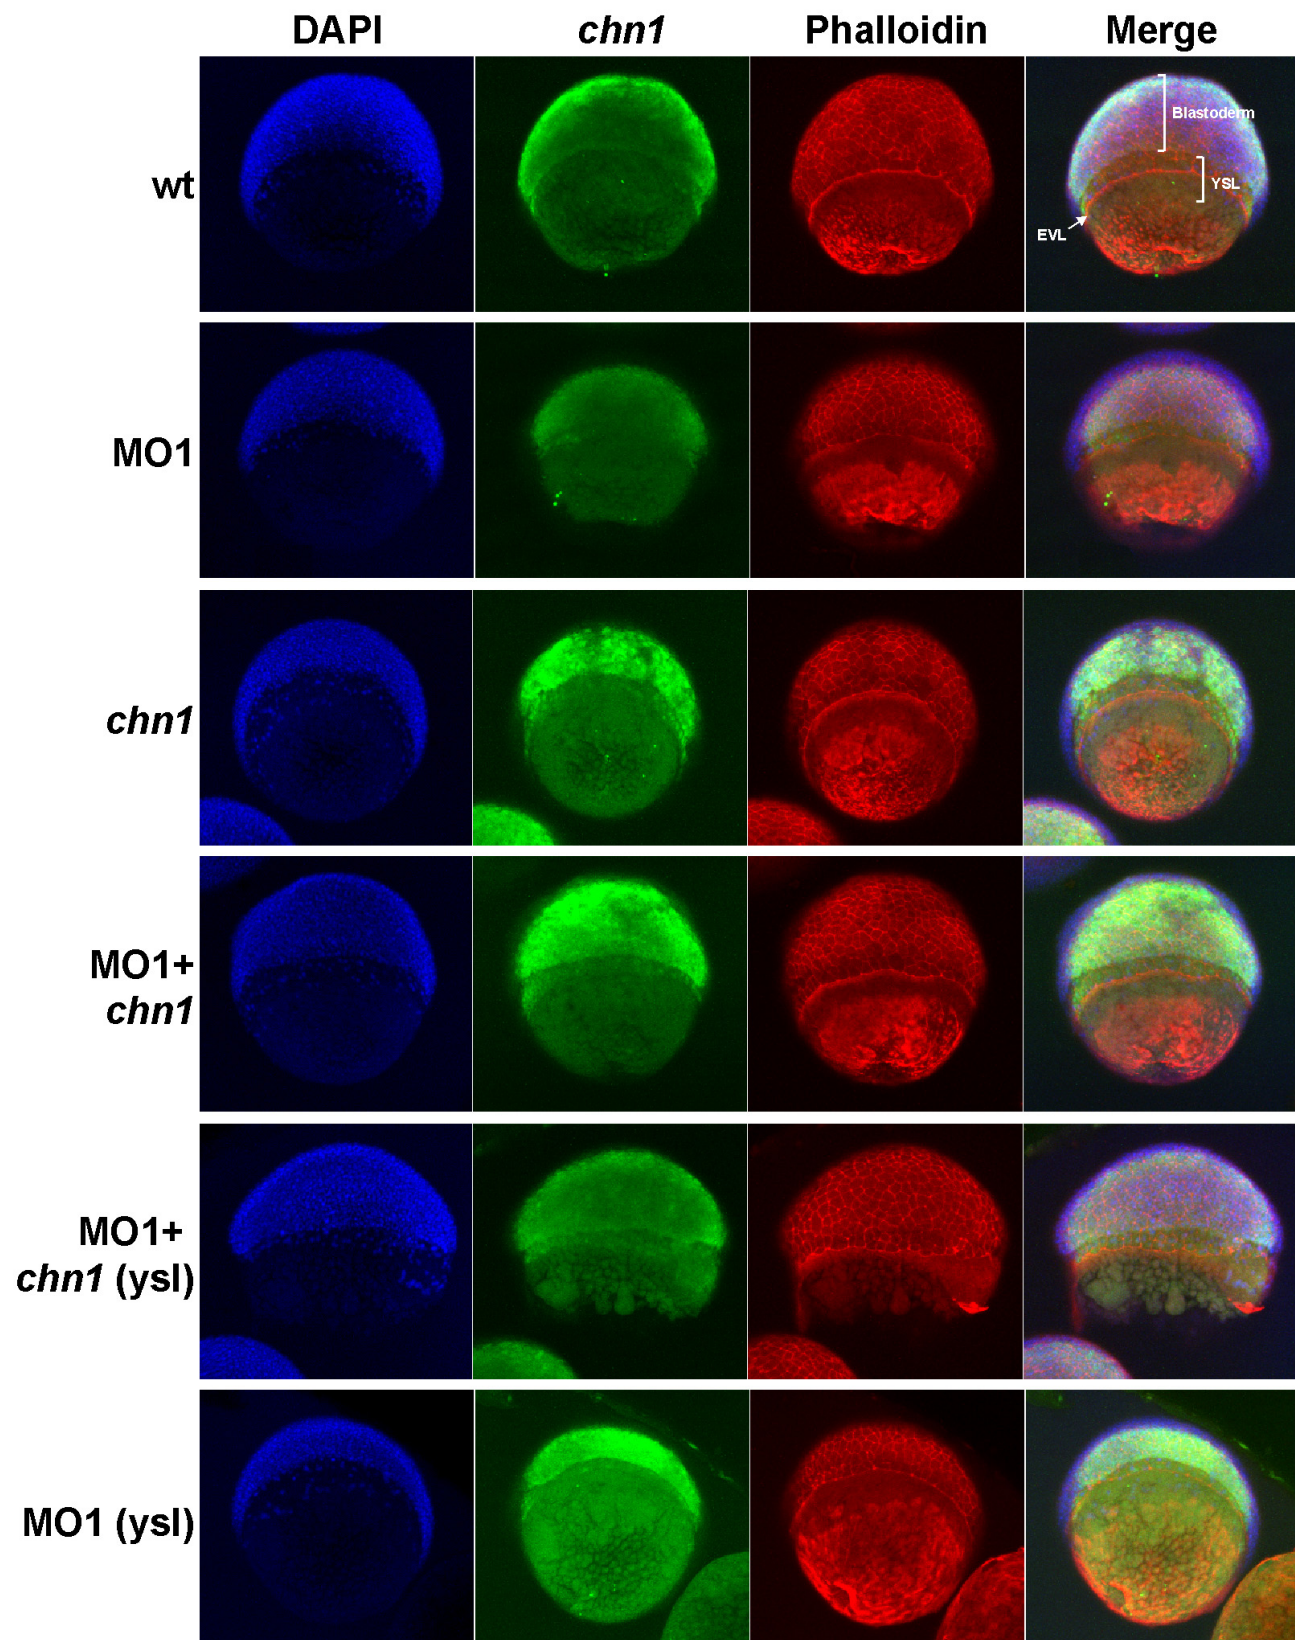

Supplement: pnas_0508585103_5.pdf [file pnas_0508585103_5.pdf]

**A**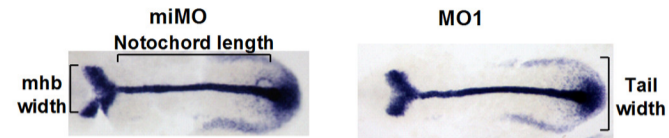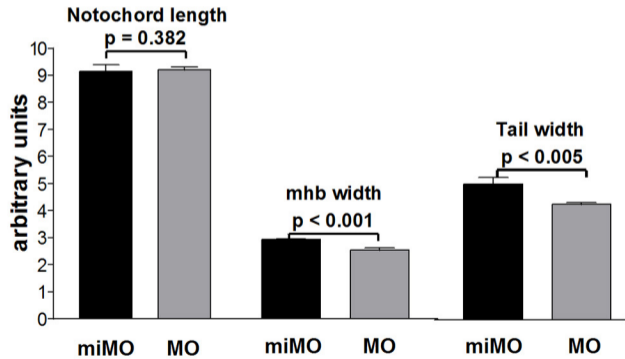**B**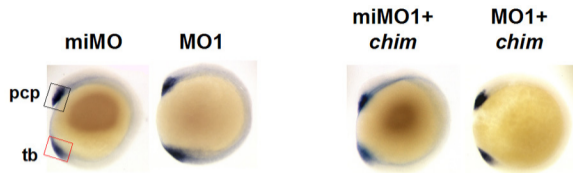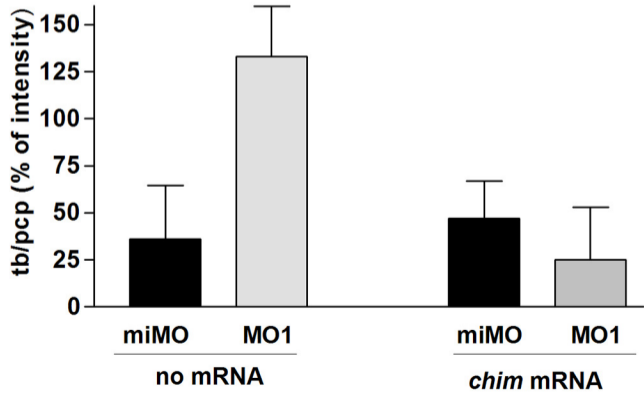

Supplement: pnas_0508585103_6.pdf [file pnas_0508585103_6.pdf]
